# Supplementary material for: Cell division cycle associated 8: A novel diagnostic and prognostic biomarker for hepatocellular carcinoma
Source: PubMed Central journal article supplement (PMC8650035; doi:10.1111/jcmm.17032), 2021-11-05
Supplement: JCMM-25-11097-s002.pdf [file JCMM-25-11097-s002.pdf]

**A**

**Normal group**

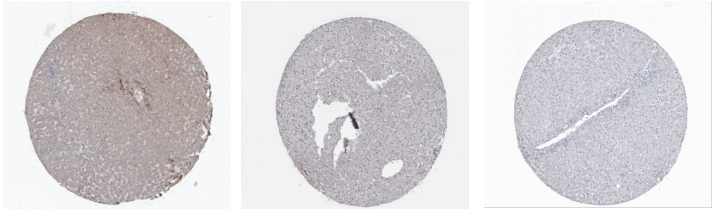

**N1**

**N2**

**N3**

**B**

**Tumor group**

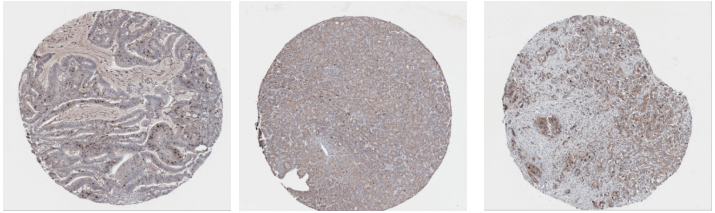

**T1**

**T2**

**T3**

**A****shNT**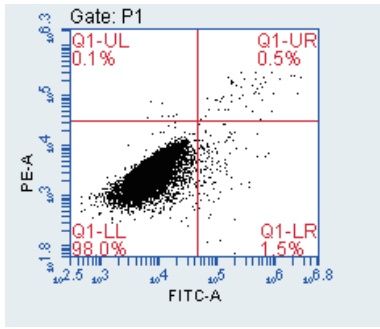**shCDCA8**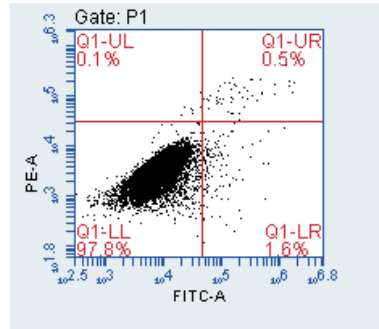

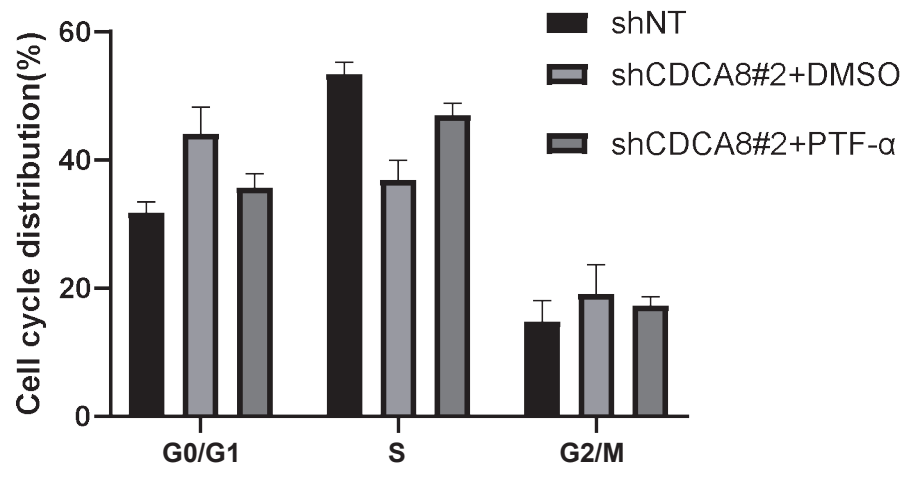

Supplementary Materials Figure 3
